# Supplementary material for: Utilization of Sugarcane Bagasse by Halogeometricum borinquense Strain E3 for Biosynthesis of Poly(3-hydroxybutyrate-co-3-hydroxyvalerate)
Source: MDPI journal article supplement (doi:10.3390/bioengineering4020050), 2017-05-25
Supplement: s1 [file s1]

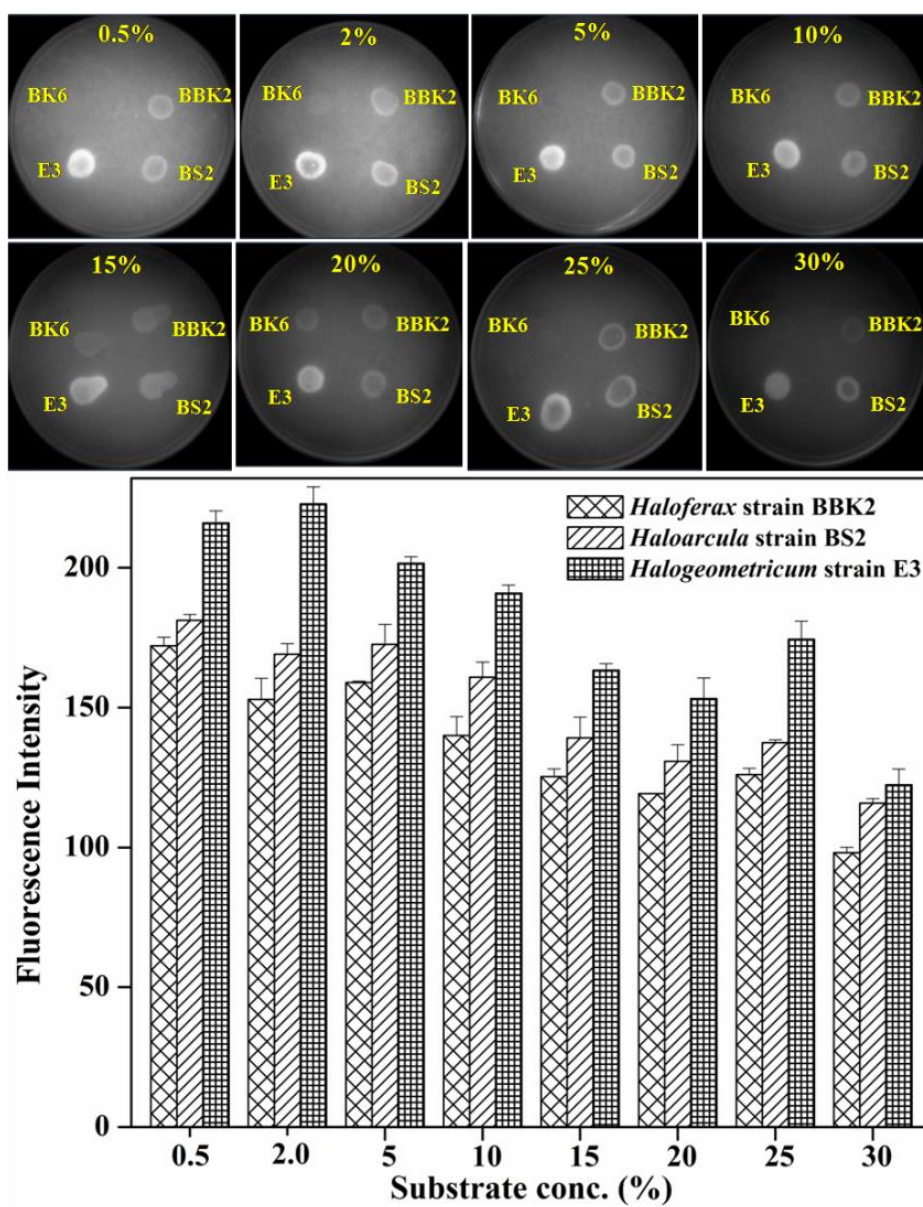

**Figure S1.** Fluorescence exhibited by the PHA accumulating haloarchaeal cultures, grown on NSM agar plates containing Nile Red dye and various concentrations (%) of SCB hydrolysate. The fluorescence emitted after UV exposure was quantified and compared using TotalLab Quant software.

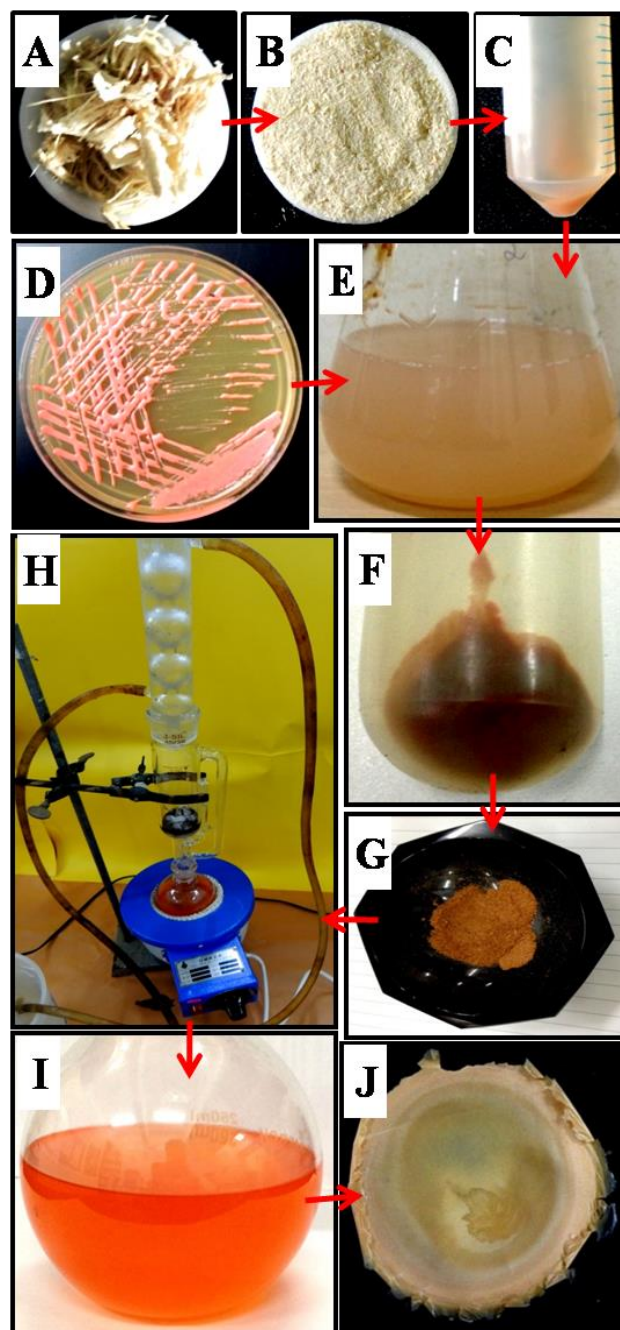

**Figure S2.** Schematic illustration of the production and extraction of PHA from *Hgm. borinquense* strain E3 using SCB. (A) SCB fibers, (B) fine powder of pulverized SCB, (C) liquid hydrolysate obtained after dilute acid hydrolysis of SCB, (D) pure culture of *Hgm. borinquense* strain E3, (E) liquid culture grown in NSM containing SCB hydrolysate, (F) culture pellet containing PHA, (G) dry cell powder obtained after drying the cells containing PHA at 70 °C and grinding using mortar and pestle, (H) polymer extraction from the cells with chloroform using soxhlet apparatus, (I) chloroform containing the polymer and (J) polymer film obtained after solvent evaporation.

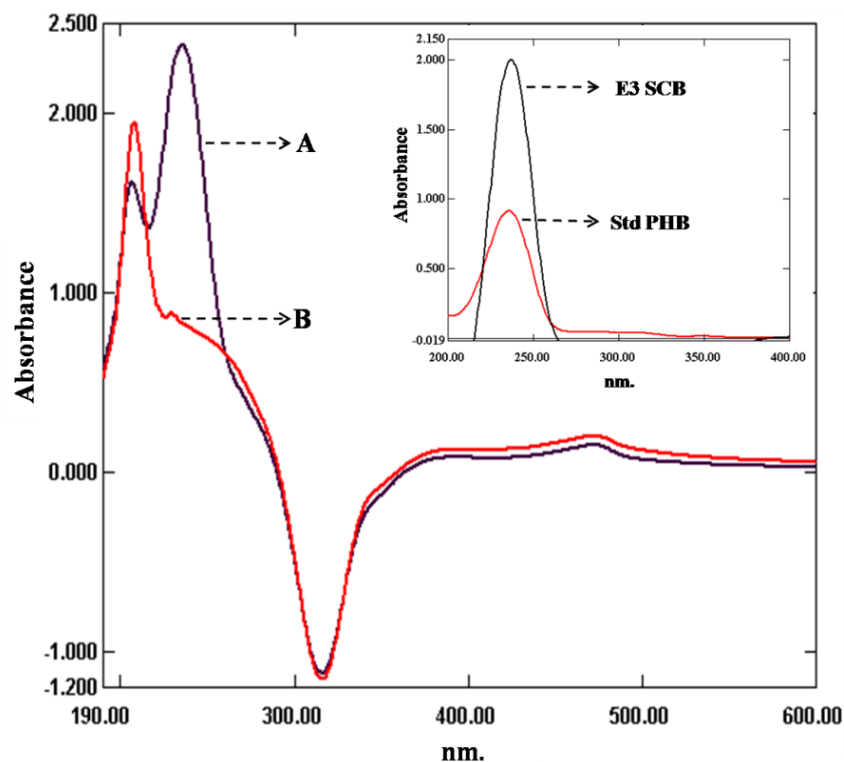

**Figure S3.** Spectrophotometric scans of concentrated sulphuric acid hydrolyzed cells of *Hgm. borinquense* strain E3 grown in NSM supplemented with SCB hydrolysate; (A) before soxhlet extraction and (B) after soxhlet extraction. Inset showing comparison of spectrophotometric scans of concentrated acid hydrolyzed standard PHB and polymer obtained from SCB hydrolysate.

**TABLE S1:** Physico-chemical characterization of the sugarcane bagasse (SCB).

| <b>Sr. no.</b>                    | <b>Characteristic</b>     | <b>SCB</b>          |
|-----------------------------------|---------------------------|---------------------|
| <b>A Physical characteristics</b> |                           |                     |
| 1.                                | Colour                    | Greenish Brown      |
| 2.                                | Odour                     | Sweet               |
| 3.                                | Texure                    |                     |
|                                   | (a) Procured form         | Long fibrous        |
|                                   | (b) Pulverized form       | Fine fibrous powder |
| 4.                                | TS (%)                    | 94.3 ±0.14          |
| 5.                                | VS (%)                    | 92.7 ±0.14          |
| <b>B Chemical characteristics</b> |                           |                     |
| <b>CHNS analysis</b>              |                           | <b>SCB</b>          |
| 1.                                | (a) Nitrogen (%)          | 0.265 ±0.02         |
|                                   | (b) Carbon (%)            | 43.455 ±1.2         |
|                                   | (c) Hydrogen (%)          | 6.095 ±0.27         |
|                                   | (d) Sulphur (%)           | 0.3225 ±0.12        |
|                                   | (e) C/N ratio (%)         | 165.83 ±8.0         |
| <b>SCB hydrolysate</b>            |                           |                     |
| 2.                                | COD (g/Kg)                | 1.18 ±0.05          |
| 3.                                | Total carbohydrates (g/L) | 12.64 ±0.7          |
| 4.                                | TKN (g/L)                 | 0.7                 |
| 5.                                | C/N ratio (%)             | 18.05               |

g/L gram per liter; % percentage
